# Supplementary material for: The Leukemia-Associated Mllt10/Af10-Dot1l Are Tcf4/β-Catenin Coactivators Essential for Intestinal Homeostasis
Source: PLOS journal article supplement (doi:10.1371/journal.pbio.1000539), 2010-11-16
Supplement: S5 (10.1371/journal.pbio.1000539.s005) [file journal.pbio.1000539.s005]

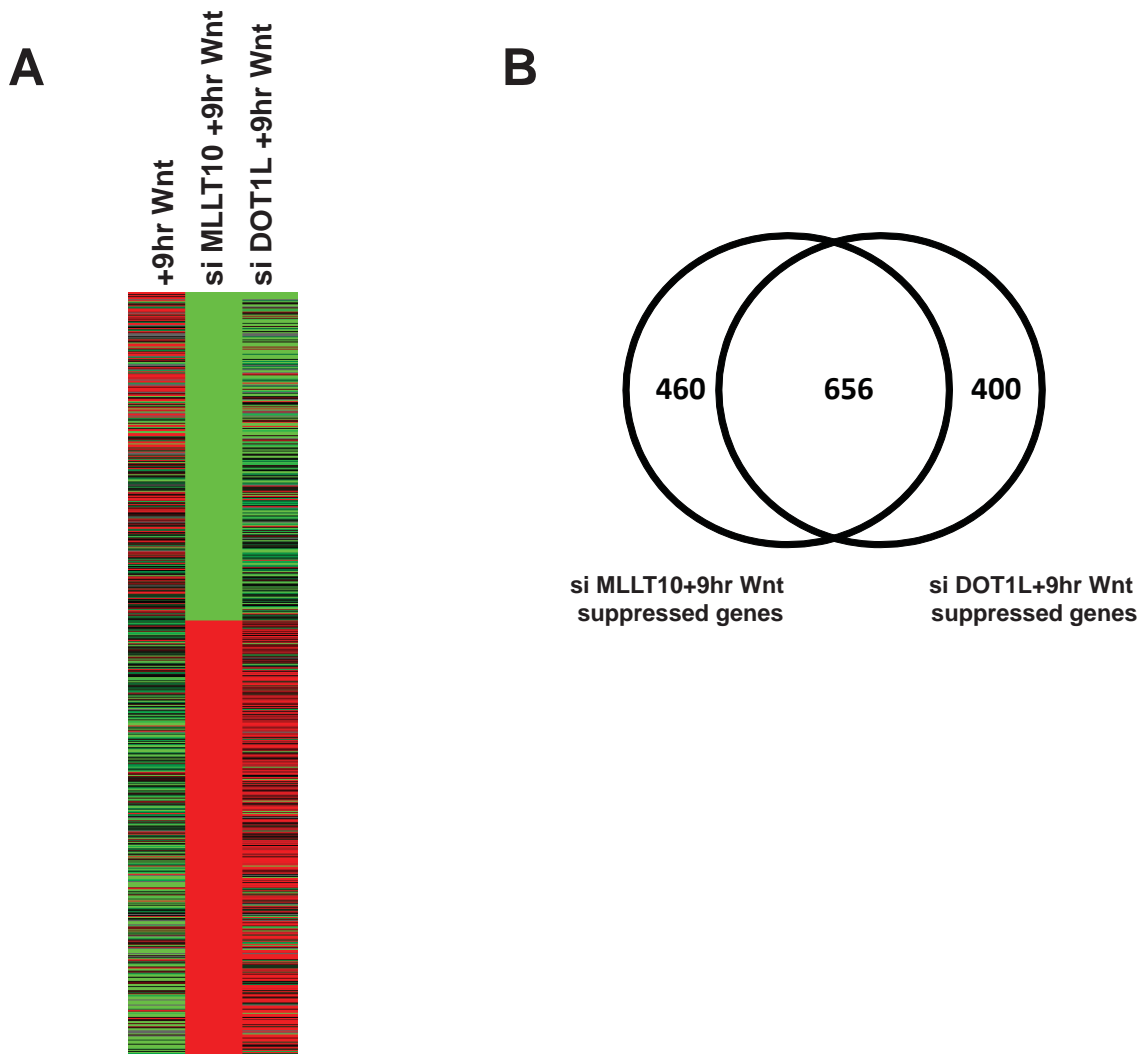

Figure S5. (A) Large overlap between differentially regulated genes in response to MLLT10 or DOT1L depletion in HEK293T cells after Wnt stimulation.
