# Supplementary material for: The Leukemia-Associated Mllt10/Af10-Dot1l Are Tcf4/β-Catenin Coactivators Essential for Intestinal Homeostasis
Source: PLoS Biol. 2010 Nov 16;8(11):e1000539. doi: 10.1371/journal.pbio.1000539 (PMC2982801; doi:10.1371/journal.pbio.1000539)
Supplement: Table S1 — List of proteins with highest scores identified by MS in Tcf4 crypt complex. (0.03 MB XLS) [file pbio.1000539.s009.xls]

## Sheet: Sheet1
	Table S1. List of proteins with highest scores identified by MS inTcf4 crypt complex
	Ctnnb1
	Tcf7l2
	Ubr5
	Tnik
	Mybbp1a
	Rif1
	Trim28
	Wdr47
	Carm1
	Rbm14
	Zfp326
	Smarca5
	Wtap
	Rbm28
	Atad3
	Smarcc2
	Smarcc1
	Flii
	Smarcd2
	Zc3h13
	Arid1a
	Chd1l
	Mllt10
	Dot1l
	Tle
	Ctbp
